# Supplementary material
Source: HighWire-hosted journal article supplement (http://ajnr-stage2.highwire.org/highwire/filestream/52854/field_highwire_adjunct_files/0/16-00253.pdf)
Supplement: 16-00253.pdf [file 16-00253.pdf]

## ON-LINE APPENDIX

### Neuropsychological Assessment

At baseline, all individuals underwent a detailed neuropsychological assessment. The control participants were evaluated with an extensive neuropsychological battery, including the MMSE,<sup>1</sup> the Hospital Anxiety and Depression Scale,<sup>2</sup> and the Lawton Instrumental Activities of Daily Living.<sup>3</sup> Their cognitive assessment included the following: 1) attention (Digit Symbol Code,<sup>4</sup> Trail-Making Test A<sup>5</sup>); 2) working memory (verbal: Digit Span Forward<sup>4</sup>; visuospatial: Visual Memory Span Forward<sup>4</sup>); 3) episodic memory (verbal: RI-48 Cued Recall Test<sup>6</sup>; visual: Shapes Test<sup>7</sup>); 4) executive functions: (Trail-Making Test B,<sup>5</sup> Wisconsin Card Sorting Test,<sup>8</sup> Phonemic Verbal Fluency Test<sup>9</sup>); 5) language (Boston Naming Test<sup>10</sup>); 6) visual gnosis (Ghent Overlapping Figures<sup>11</sup>); 7) praxis: ideomotor,<sup>12</sup> reflexive,<sup>13</sup> and constructional (Consortium to Establish a Registry for Alzheimer Disease, figure copy subtest<sup>14</sup>).

All of these tests are routinely used in clinical settings to assess the main cognitive functions, namely the following: 1) attention; 2) memory (working memory referring to the short-term ability to store and manipulate information; episodic memory for autobiographic data and daily actions; visual memory involved in encoding, storage, and recall of visual information); 3) executive functions focusing on reasoning, problem solving, and planning necessary for the cognitive control of behavior; 4) language; 5) visual gnosis, referring to the ability to recognize simple and complex visual objects; and 6) praxis (ideomotor: planning or completing motor actions that rely on semantic memory; reflexive: use of the body to imitate meaningless gestures; and constructional: drawing or constructing simple configurations). The education level was defined according to the Swiss Educational System: level 1: <9 years (primary school); level 2: between 9 and 12 years (high school); and level 3: >12 years (university). All individuals were also evaluated with the Clinical Dementia Rating scale,<sup>15</sup> and only subjects with a CDR score of 0 and scores within 1.5 SDs of the age-appropriate mean in all other tests were included in the control group.

For MCI participants, we used a shortened battery to confirm their status, including the MMSE,<sup>1</sup> the Hospital Anxiety and Depression Scale,<sup>2</sup> and the Lawton Instrumental Activities of Daily Living.<sup>3</sup> The cognitive assessment was shorter than that for controls; it included the following: attention (Trail-Making Test A<sup>5</sup>); working memory (verbal: Digit Span Forward<sup>4</sup>); episodic memory (verbal: RI-48 Cued Recall Test<sup>6</sup> or RL/RI-16 Free and Cued Recall Test<sup>6</sup>); executive functions (Trail-Making Test B<sup>5</sup> and Phonemic Verbal Fluency Test<sup>9</sup>); language (Boston Naming Test<sup>10</sup> and Consortium to Establish a Registry for Alzheimer Disease praxis figure copy subtest<sup>14</sup>). All individuals were also evaluated

with the Clinical Dementia Rating scale.<sup>15</sup> In agreement with the Petersen criteria,<sup>16</sup> participants having a CDR score of 0.5 but no dementia and a score exceeding 1.5 SDs below the age-appropriate mean in any of the above tests were confirmed as to their MCI status.

## REFERENCES

1. Folstein MF, Folstein SE, McHugh PR. "Mini-mental state": a practical method for grading the cognitive state of patients for the clinician. *J Psychiatr Res* 1975;12:189–98 CrossRef Medline
2. Zigmond AS, Snaith RP. The hospital anxiety and depression scale. *Acta Psychiatr Scand* 1983;67:361–70 CrossRef Medline
3. Barberger-Gateau P, Commenges D, Gagnon M, et al. Instrumental activities of daily living as a screening tool for cognitive impairment and dementia in elderly community dwellers. *J Am Geriatr Soc* 1992; 40:1129–34 CrossRef Medline
4. Wechsler D. *Wechsler Adult Intelligence Scale*. 3rd ed. WAIS-III. San Antonio: Harcourt Assessment; 1997
5. Reitan RM. Validity of the trail making test as an indicator of organic brain damage. *Perceptual and Motor Skills* 1958;8:271–76
6. Adam S, Van der Linden M, Poitrenaud J, et les membres du GREMEM. L'épreuve de rappel indicé à 48 items (RI-48). In: Van der Linden M, Adam S, Agniel A, et les membres du GREMEM, eds. *L'évaluation des troubles de la mémoire: Présentation de quatre tests de mémoire épisodique (avec leur étalonnage)*. Marseille: F. Solal; 2004:49–67
7. Baddeley A, Emslie H, Nimmo-Smith I. *Doors and People: A Test of Visual and Verbal Recall and Recognition*. Suffolk: Thames Valley Test Company; 1994
8. Heaton RK, Chelune G, Talley JL, et al. *Wisconsin Card Sorting Test Manual, Revised and Expanded*. Odessa: Psychological Assessment Resources; 1981
9. Cardebat D, Doyon B, Puel M, et al. Formal and semantic lexical evocation in normal subjects: performance and dynamics of production as a function of sex, age and educational level [in French]. *Acta Neurol Belg* 1990;90:207–17 Medline
10. Kaplan EF, Goodglass H, Weintraub S. *The Boston Naming Test*. 2nd ed, Philadelphia: Lea & Febiger; 1983
11. Ghent L. Perception of overlapping and embedded figures by children of different ages. *Am J Psychol* 1956;69:575–87 CrossRef Medline
12. Schnider A, Hanlon RE, Alexander DN, et al. Ideomotor apraxia: behavioral dimensions and neuroanatomical basis. *Brain Lang* 1997;58:125–36 CrossRef Medline
13. Poeck K. Clues to the nature of disruption to limb praxis. In: Roy E, ed. *Neuropsychological Studies of Apraxia and Related Disorders*. New York: North-Holland; 1985:99–109
14. Welsh KA, Butters N, Mohs RC, et al. The Consortium to Establish a Registry for Alzheimer's Disease (CERAD), part V: a normative study of the neuropsychological battery. *Neurology* 1994;44:609–14 CrossRef Medline
15. Hughes CP, Berg L, Danziger WL, et al. A new clinical scale for the staging of dementia. *Br J Psychiatry* 1982;140:566–72 CrossRef Medline
16. Petersen RC. Mild cognitive impairment as a diagnostic entity. *J Intern Med* 2004;256:183–94 CrossRef Medline
